# Supplementary material for: A Palindromic Motif in the −2084 to −2078 Upstream Region is Essential for ABCA12 Promoter Function in Cultured Human Keratinocytes
Source: PubMed Central journal article supplement — Sci Rep. 2014 Oct 23;4:6737. doi: 10.1038/srep06737 (PMC4206840; doi:10.1038/srep06737), 2014-10-23
Supplement: srep06737-s1.pdf [file srep06737-s1.pdf]

## **Supplementary Information**

### **A Palindromic Motif in the -2084 to -2078 Upstream Region is Essential for ABCA12 Promoter Function in Cultured Human Keratinocytes**

Yoshitaka Shimizu<sup>1</sup>, Yasushi Ogawa<sup>1</sup>, Kazumitsu Sugiura<sup>1</sup>, Jun-ichi Takeda<sup>2</sup>, Kaori Sakai-Sawada<sup>3</sup>, Teruki Yanagi<sup>3</sup>, Atsushi Kon<sup>4</sup>, Daisuke Sawamura<sup>5</sup>, Hiroshi Shimizu<sup>3</sup>, Masashi Akiyama<sup>1\*</sup>

<sup>1</sup>Department of Dermatology, and <sup>2</sup>Division of Neurogenetics, Nagoya University Graduate School of Medicine, Nagoya, Japan

<sup>3</sup>Department of Dermatology, Hokkaido University Graduate School of Medicine, Sapporo, Japan

<sup>4</sup>Department of Nutrition, Aomori University of Health and Welfare, Aomori, Japan

<sup>5</sup>Department of Dermatology, Hirosaki University Graduate School of Medicine, Hirosaki, Japan

\*Correspondence:

Masashi Akiyama, M.D., Ph.D.

Department of Dermatology

Nagoya University Graduate School of Medicine

65 Tsurumai-cho, Showa-ku, Nagoya 466-8550, Japan

Telephone: +81-52-744-2314

Fax: +81-52-744-2318

E-mail: [makiyama@med.nagoya-u.ac.jp](mailto:makiyama@med.nagoya-u.ac.jp)

## Supplementary Figures

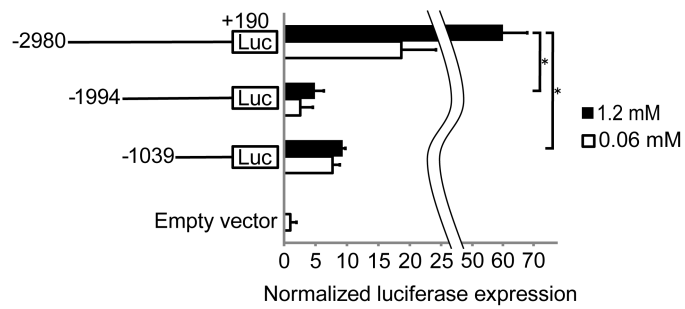

### Supplementary Figure S1. Detailed presentation of promoter activities of less potent reporters used in Figure 1

Figure 1 is differently represented with a magnified Y-scale to show the promoter activities of less potent reporters.

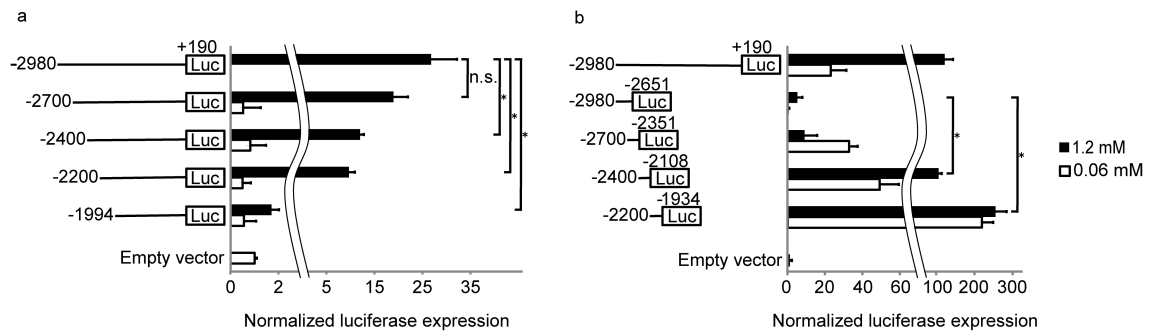

**Supplementary Figure S2. Detailed presentation of promoter activities of less potent reporters used in Figure 3**

Figure 3 is differently represented with a magnified Y-scale to show the promoter activities of less potent reporters.

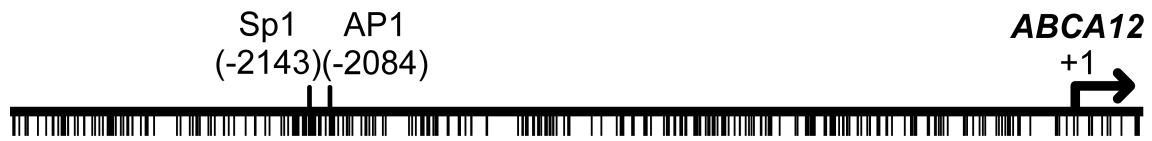

**Supplementary Figure S3. Diagram of putative transcription factor binding elements**

The -2980 to -1934 region of the *ABCA12* gene is depicted. The predicted AP1 element and the predicted Sp1 element within the -2200/-1934 fragment are shown. The TSS is indicated by the bent arrow. Downward bars represent 398 putative transcription factor binding sites predicted by the *in silico* analysis.

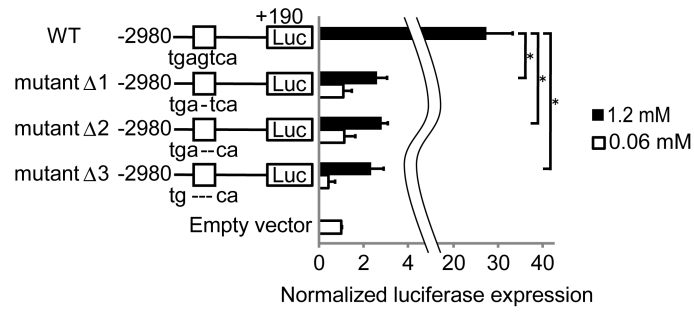

**Supplementary Figure S4. Detailed presentation of promoter activities of less potent reporters used in Figure 4**

Figure 4 is differently represented with a magnified Y-scale to show the promoter activities of less potent reporters.

|                        |                     |
|------------------------|---------------------|
| Human                  | ACACTTGAGTCAAGTCAT  |
| Chimp                  | ACACTTGAGTCAAGTCAT  |
| Gorilla                | ACACTTGAGTCAAGTCAT  |
| Orangutan              | ACACTTGAGTCAAGTCGT  |
| Gibbon                 | ACACTTGAGTCAAGTCAT  |
| Rhesus                 | ACACTTGAGTCAAGTCGT  |
| Crab-eating_macaque    | ACACTTGAGTCAAGTCGT  |
| Baboon                 | ACACTTGAGTCAAGTCGT  |
| Green_monkey           | ACACTTGAGTCAAGTCAT  |
| Marmoset               | ACACTTGAGTCAAGTCAT  |
| Squirrel_monkey        | ACACTTGAGTCAAGTCAT  |
| Bushbaby               | ACACTTGAGTCAAGTCAT  |
| Squirrel               | ACACTTGAGTCAAGTCAT  |
| Guinea_pig             | ACGCATGAGTCAAGTCAT  |
| Pig                    | GCATTTGAGTCAAGTCAT  |
| Tibetan_antelope       | ACAGTTGAGTCAAGTCAT  |
| Cow                    | ACAGTTGAGTCAAGTCAT  |
| Sheep                  | ACAAGTCAAGTCAT      |
| Domestic_goat          | ACAATGAGTCAAGTCAT   |
| White_rhinoceros       | ACACTTGAGTCAAGTCAT  |
| Cat                    | ACACTTGAGTCAAGTTGT  |
| Dog                    | ACACTTGAGTCAAGTTGC  |
| Ferret                 | ACACTTGAGTCAAGTTAT  |
| Panda                  | ACACTTGAGTCAAGTTGT  |
| Pacific_walrus         | ACACTTGAGTCAAGTTGC  |
| Weddell_seal           | ACACTTGAGTCAAGTTGT  |
| Star-nosed_mole        | ACACTTGAGTCAAGTCAT  |
| Elephant               | ACACTTGAGTCAAGTCAT  |
| Cape_golden_mole       | ACACTTGAGTCAAGTCAT  |
| Armadillo              | AAACTTGAGTCAAGTCAT  |
| Alpaca                 | ACAGCTGAGTCAAGTCGT  |
| Bactrian_camel         | ACATCTGAGTCAAGTCGT  |
| Naked_mole-rat         | AGTAAAGAGTCAAGTCAT  |
| Brush-tailed_rat       | ACTCATGAGCCAGTCAT   |
| Horse                  | GCACTTTGATTTAGTTGT  |
| Chinese_tree_shrew     | ACACCTGAGTCAATCAT   |
| Lesser_Egyptian_jerboa | ATGCTTGAATCAGCCAT   |
| Mouse                  | ACACTTGAATCAGCCCC   |
| Prairie_vole           | ACACTTGAATCAGTACC   |
| Chinese_hamster        | CCGCTTGAATCAGTCCT   |
| Rat                    | ACGCTTGAATCAGTCCT   |
| Chinchilla             | ACACATGAGTCAATTAT   |
| Rabbit                 | ACACTTGAGTCAAGTCCT  |
| Pika                   | ACACTTGTGTAAGTCCT   |
| Dolphin                | GCACTTTTGTCAAGTCCT  |
| Killer_whale           | GCACTTTTGTCAAGTCCT  |
| Black_flying-fox       | ACATTTGAGTCAATTTGT  |
| David's_myotis_(bat)   | ATATTTGAGTCAATTCAT  |
| Big_brown_bat          | ACATTTGAGTCAATTCAT  |
| Microbat               | ACATTTGG-GTCAATTCAT |
| Hedgehog               | ACATTTGAGTCTATCAT   |
| Aardvark               | ACGTTTGAATCAGTCCT   |
| Megabat                | ACCTTTGAATCAGTTGT   |
| Golden_hamster         | CCAATCGAATCAGTCCT   |
| Cape_elephant_shrew    | ATCCTTGCAGTCAG----  |
| Consensus              | ACACTTGAGTCAAGTCAT  |

ACACTTGAGTCAAGTCAT

**Supplementary Figure S5. The -2084/-2078 AP1 binding element is highly conserved among vertebrate species.**

The multiple alignments of the -2048 to -2078 region of the ABCA12 among 55 vertebrate species are shown. The -2084/2078 motif is boxed. The consensus sequence is shown as a sequence logo at the bottom.
